# Supplementary material
Source: Springer Nature journal article supplement (https://www.springermedizin.de/resource/supplementary/12878_2013_17_MOESM1_ESM.pdf/9686380)

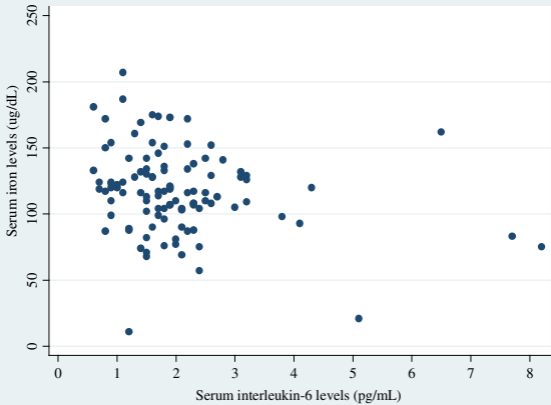

Supplement: MOESM1 [file 9686380]
